# Supplementary material for: Antioxidant and antibacterial properties of transition metals and metal oxides for medical uses: mechanisms, design strategies, and biomedical perspectives
Source: Royal Society of Chemistry journal article supplement (doi:10.1039/d6na00329j), 2026-06-03
Supplement: d6na00329j1.pdf [file d6na00329j1.pdf]

**(a) *E. coli***

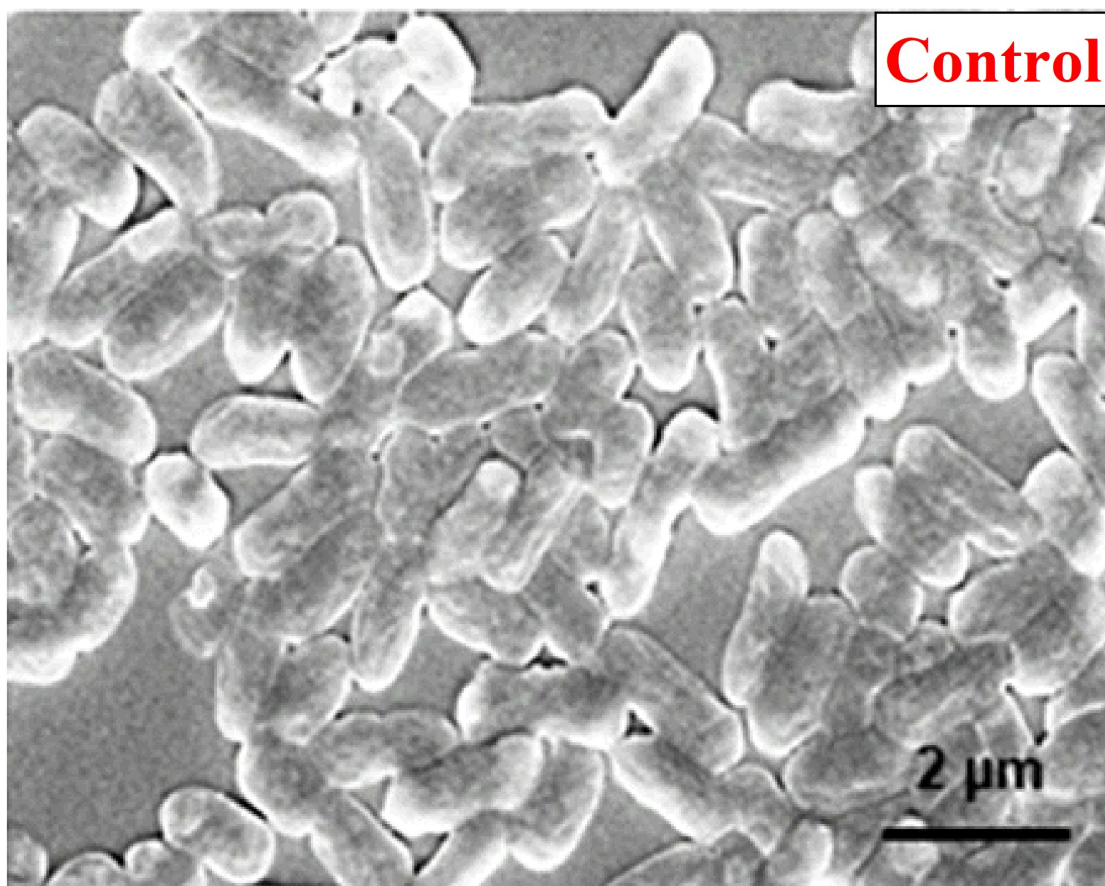

**(a) *E. coli***

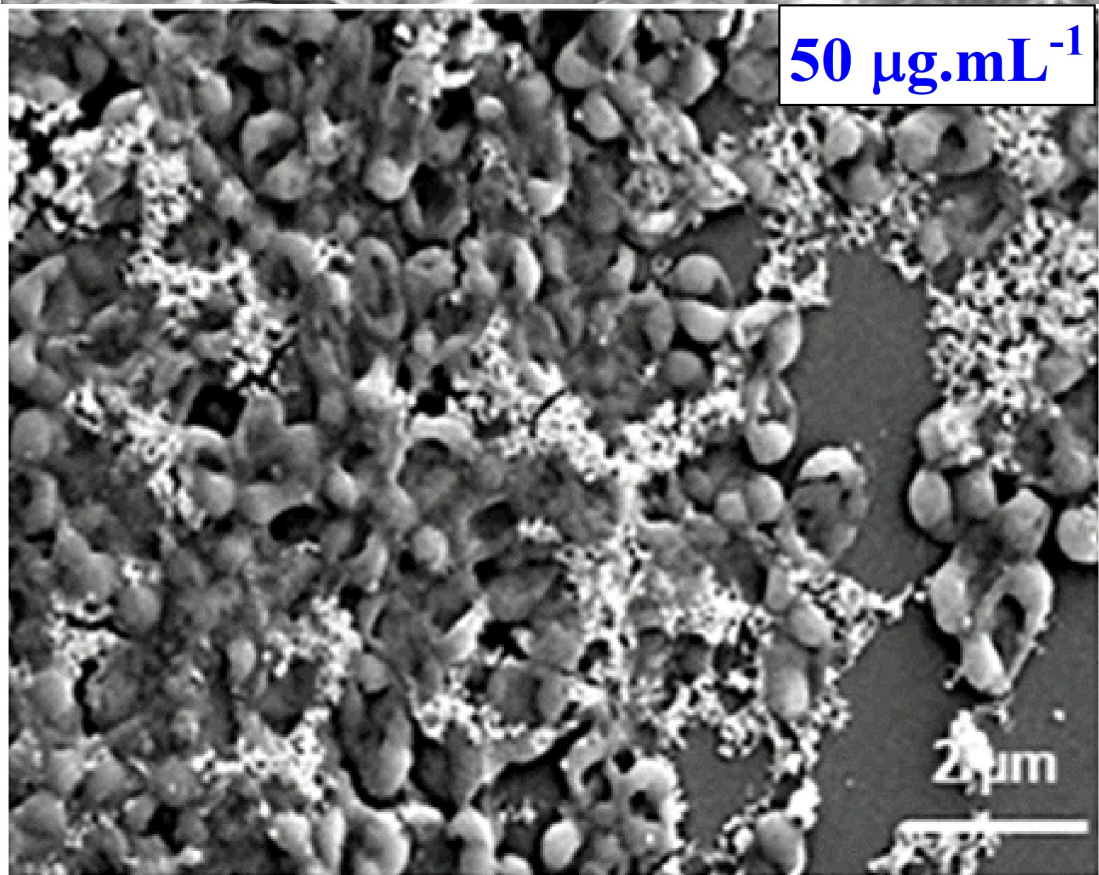

**(a) *E. coli***

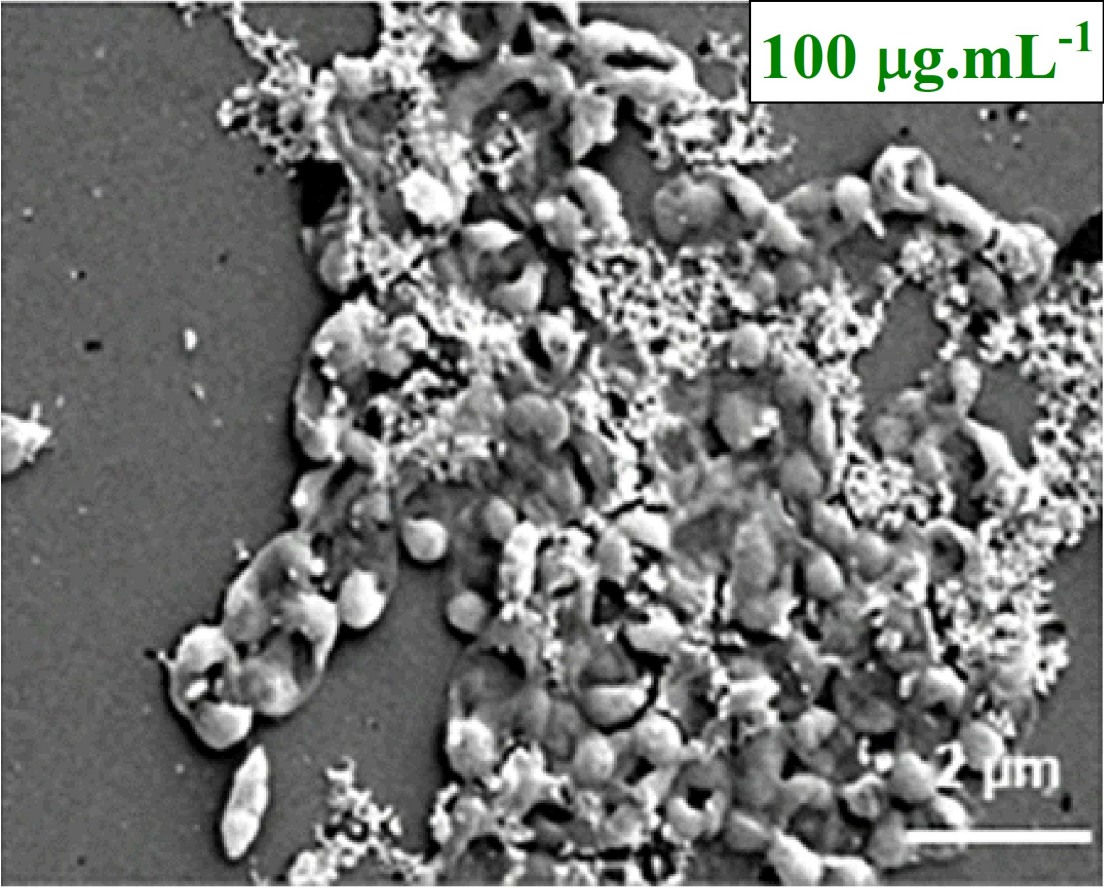

**(b) *P. aeruginosa***

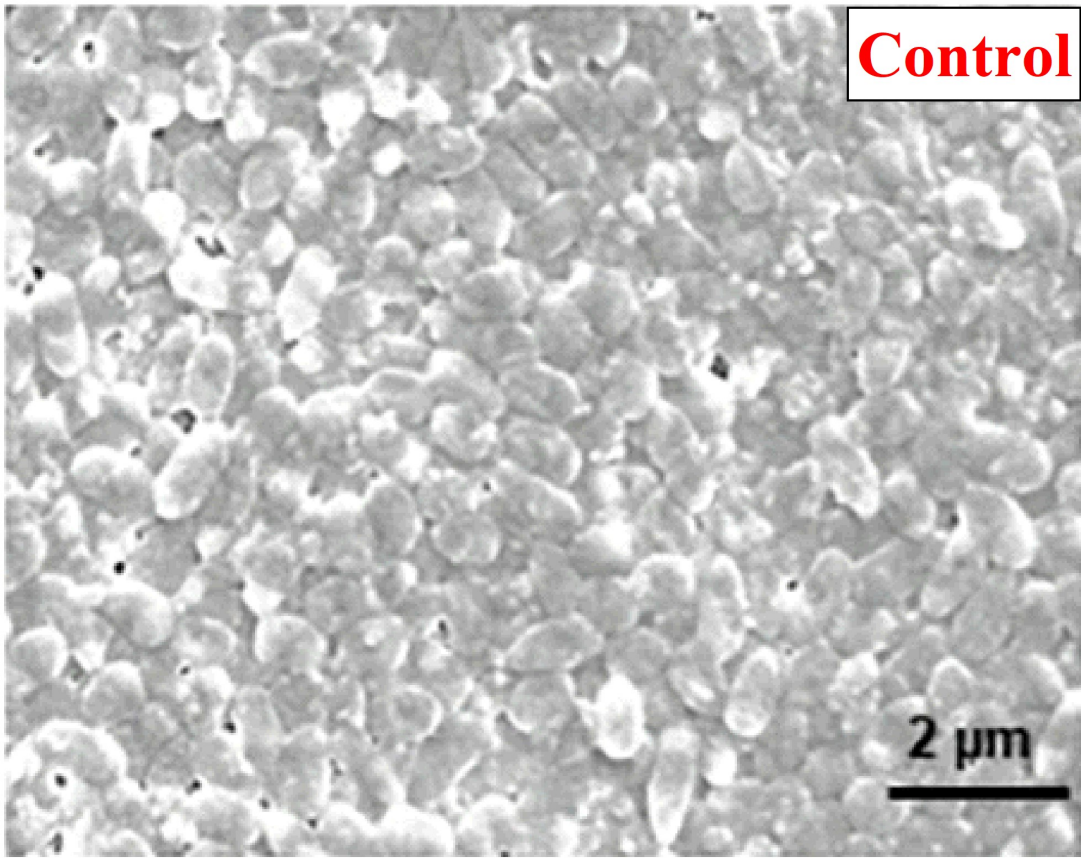

**(b) *P. aeruginosa***

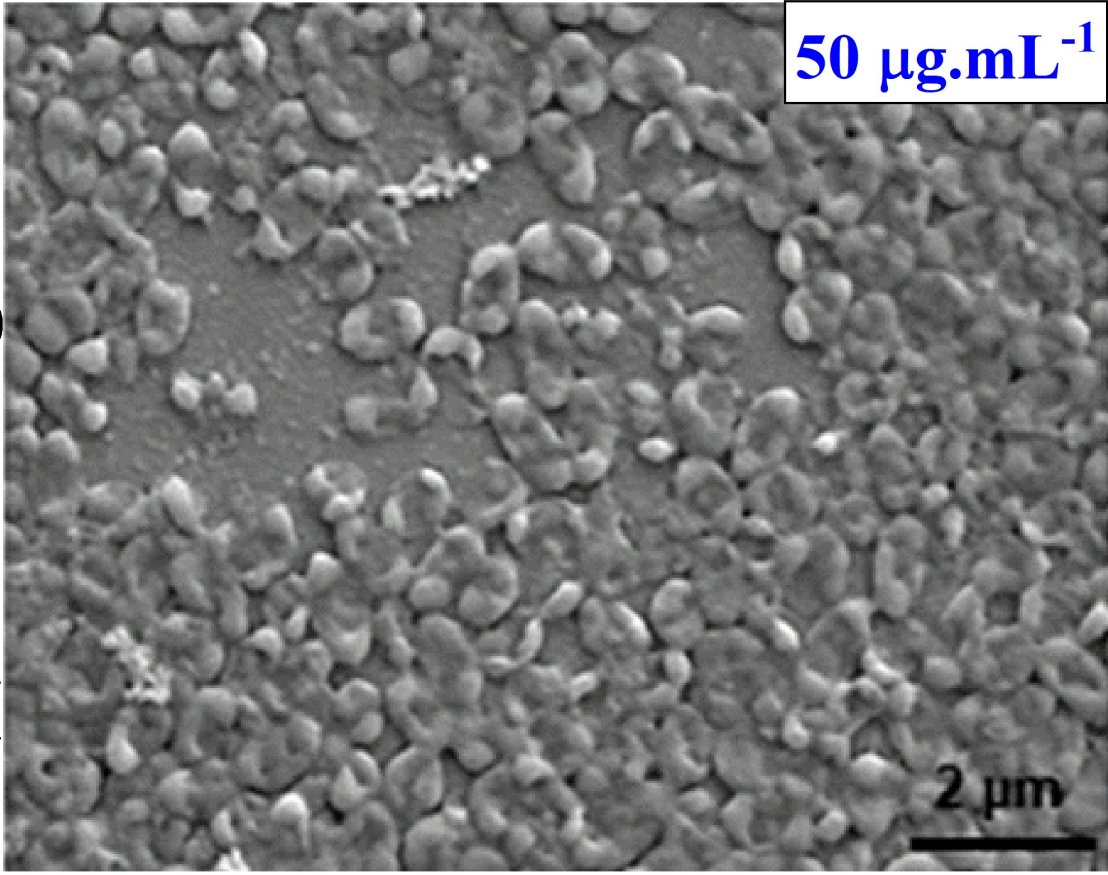

**(b) *P. aeruginosa***

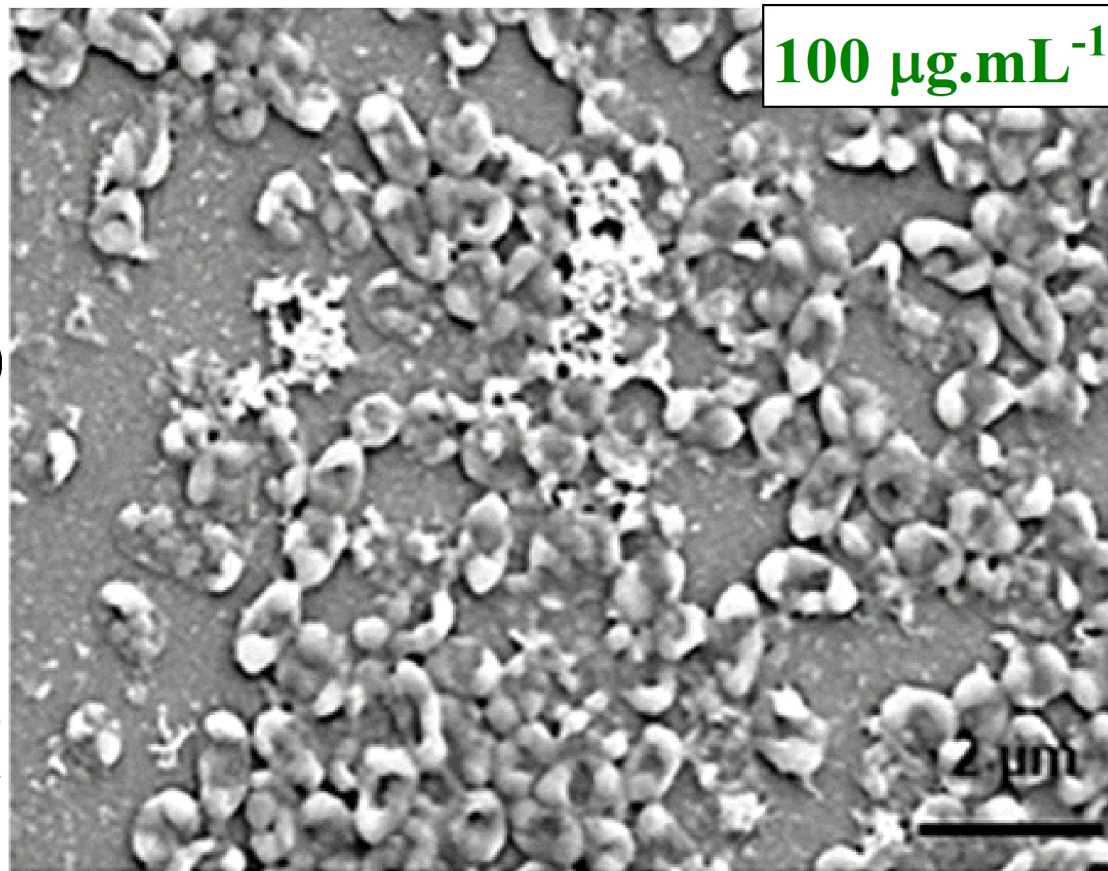

Fig. 1S SEM images of bacteria cells treated with different concentrations of AgNPs

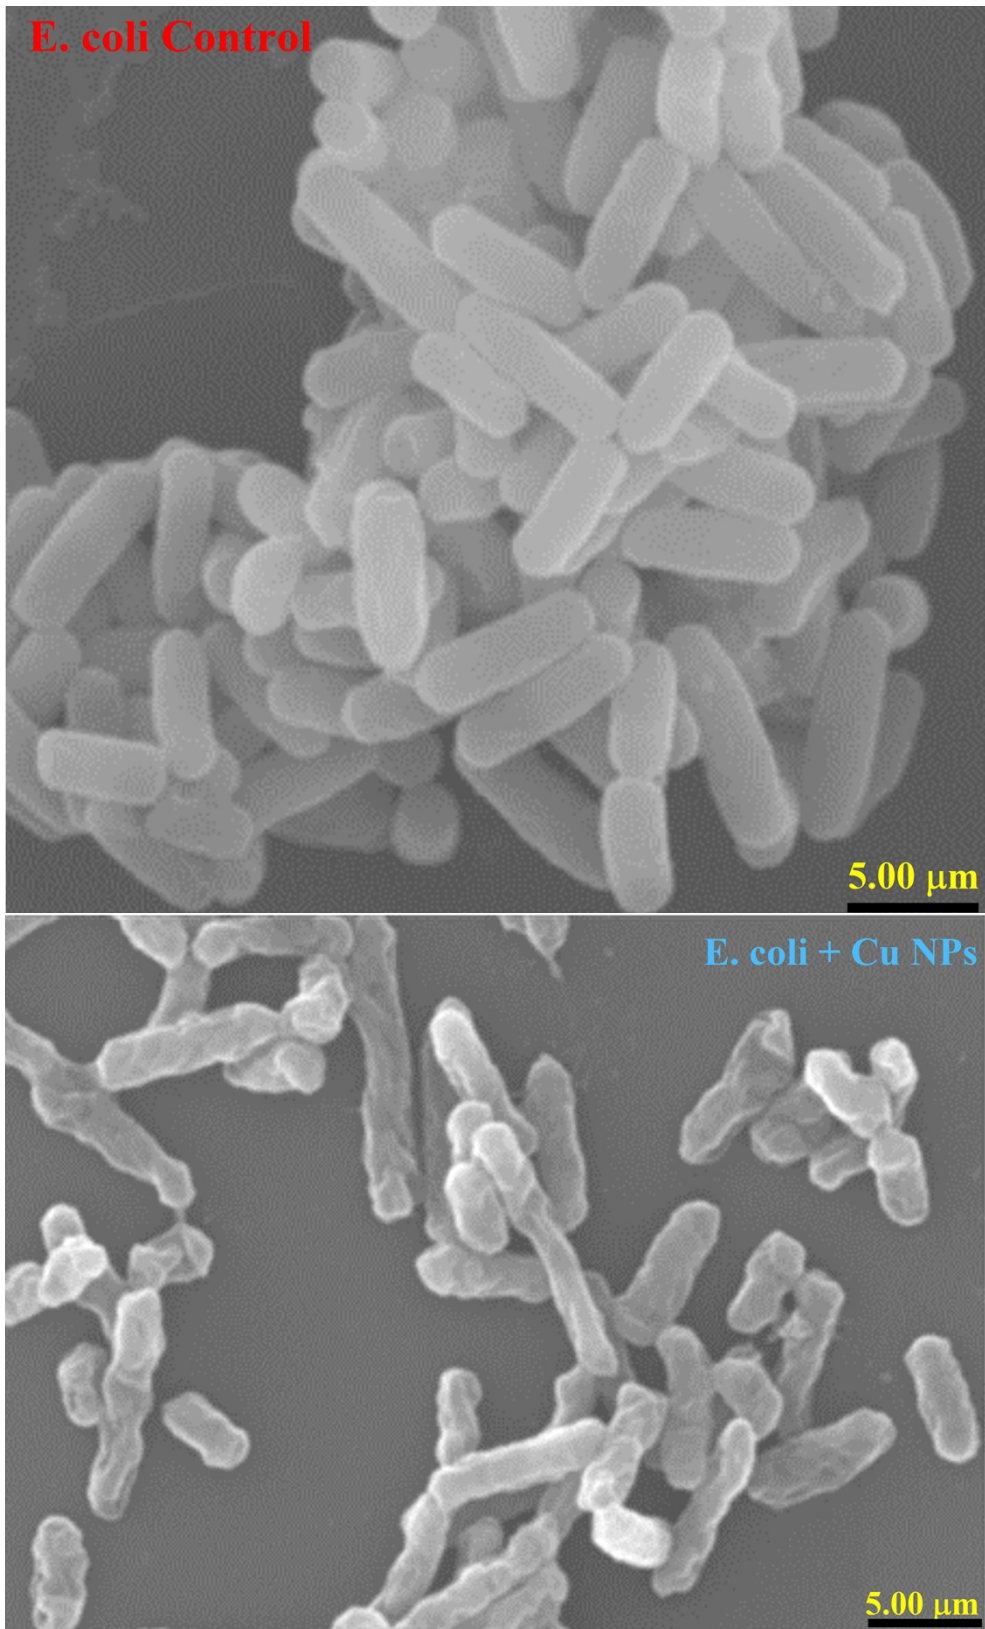

**Fig. 2S** SEM micrographs showing the effect of Cu NPs on *E. coli*
